# Supplementary material for: Neuron-like differentiation of mesenchymal stem cells on silicon nanowires
Source: Royal Society of Chemistry journal article supplement (doi:10.1039/c5nr05787f), 2015-01-01
Supplement: c5nr05787f2.pdf [file c5nr05787f2.pdf]

## Supplementary Information

### Neuron-like differentiation of mesenchymal stem cells on silicon nanowires

Hyunju Kim<sup>a</sup>, Ilsoo Kim<sup>b</sup>, Heon-Jin Choi<sup>b</sup>, So Yeon Kim<sup>\*ac</sup>, and Eun Gyeong Yang<sup>\*ad</sup>

<sup>a</sup>Center for Theragnosis, Biomedical Research Institute, Korea Institute of Science and Technology, Hwarangno 14-gil 5, Seongbuk-gu, Seoul 136-791, South Korea

<sup>b</sup>Department of Materials Science and Engineering, Yonsei University, Seoul 120-749, South Korea

<sup>c</sup>Department of Biomedical Engineering, Korea University of Science and Technology, KIST campus, Seoul 136-791, South Korea

<sup>d</sup>Department of Biological Chemistry, Korea University of Science and Technology, KIST campus, Seoul 136-791, South Korea

\*To whom correspondence should be addressed:

Eun Gyeong Yang, eunyang@kist.re.kr; telephone 82-2-958-5178; fax 82-2-958-5909,

So Yeon Kim, soyeonkim@kist.re.kr; telephone 82-2-958-5914; fax 82-2-958-5909

## Figure captions

**Fig. S1** Behaviors of hMSCs on etched SiNWs. (a) Morphological changes of various cells on SiNWs. Fluorescence images of HeLa cells, hMSCs, and HUVECs cultured on either Si wafers or long SiNWs were obtained by CFDA staining. For HUVECs, the Si wafer was coated with FN for proper adhesion. Scale bar, 50  $\mu\text{m}$ . (b) Cell morphology changes on various surfaces. Fluorescence images of hMSCs on various surfaces at day 3 were obtained by CFDA staining. (c) Assessment of cell mobility. A schematic of the experimental procedure is presented (top). A HUVEC solution (10  $\mu\text{L}$ ) was dropped on various surfaces and incubated for 1 h until cells were attached to the surface. Cell-attached Si wafers or SiNWs were then transferred into a culture plate with the appropriate media and incubated for 1 day. For comparison, the tube formation of HUVECs on a matrigel-coated plate was included. Fluorescence images of HUVECs on various surfaces were obtained by CFDA staining (bottom). Scale bar, 100  $\mu\text{m}$ . (d) Gene expression analysis of hMSCs. Expression levels of neuronal markers, TUBB3, and NEGR1 at day 3 on various surfaces (top). Each mRNA level was normalized to GAPDH, and the mRNA level of hMSCs on the culture plate was set to 1 for comparison. Expression levels of osteogenic markers, RUNX2 and COL1A1 at day 3 on various surfaces in the presence of osteogenic supplements (Pt-3002, Lonza, USA) (bottom). PL, plate; LN, long SiNWs; N, normal medium; D, medium with osteogenic supplements. Each mRNA level was normalized to GAPDH, and the mRNA level of hMSCs on the culture plate without osteogenic supplements was set to 1 for comparison. Detailed information on the SiNWs is described elsewhere.<sup>1</sup>

**Fig. S2** Live/dead cell assays of hMSCs on Si wafers and long SiNWs at day 3. Scale bar, 100  $\mu\text{m}$ . The relative ratio of PI stained cells (%) was calculated. The bar represents the mean  $\pm$  S.D. (\* $p < 0.05$ )

**Fig. S1**

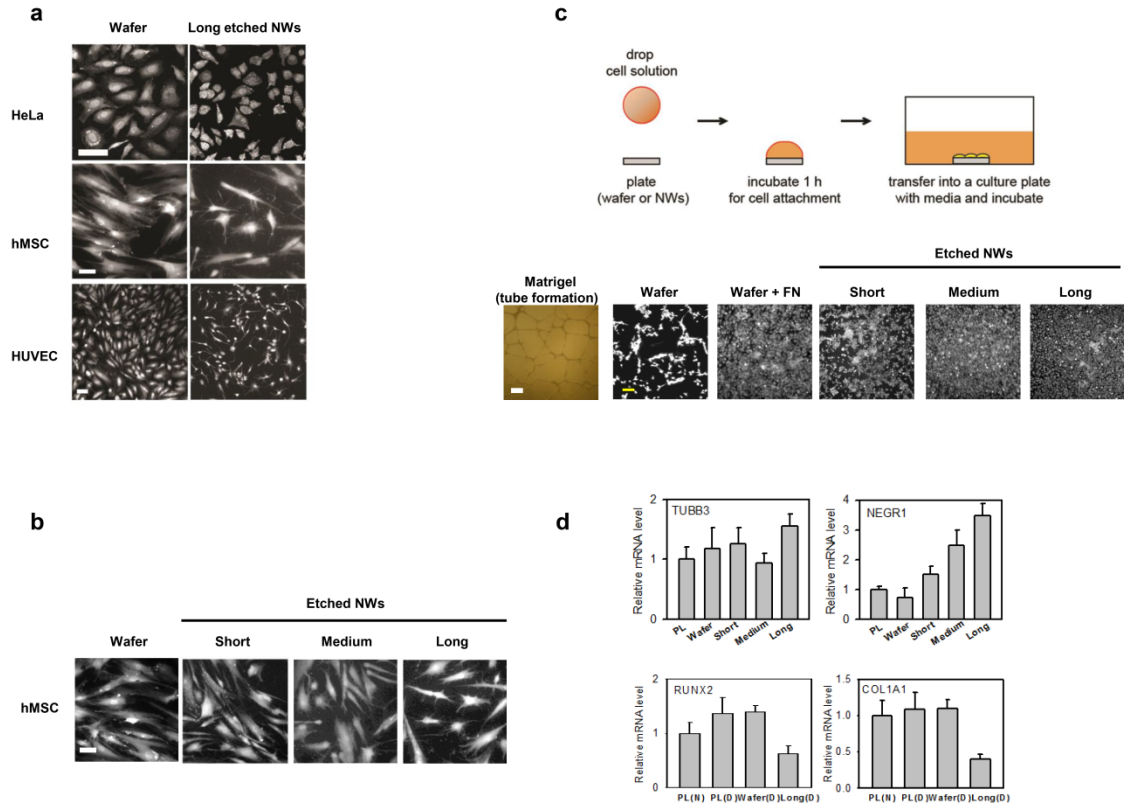

**Fig. S2**

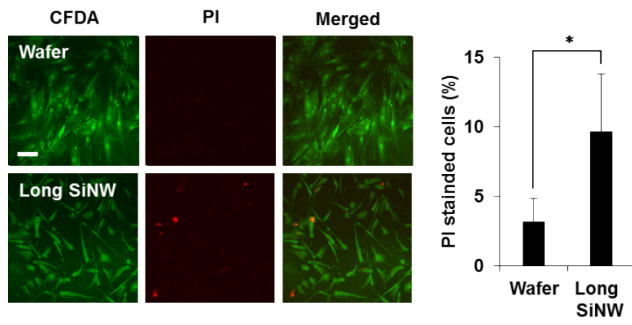

## **Movies**

**Movies S1 and S2.** Time-lapse imaging of EGFP-expressing hMSCs on Si wafers. Images were taken every 10 min for 10 h (60 frames in total). Images are presented as 10 frames/sec (6000X faster).

**Movies S3 and S4.** Time-lapse imaging of EGFP-expressing hMSCs on SiNWs. Images were taken every 10 min for 10 h (60 frames in total). Images are presented as 10 frames/sec (6000X faster).

**Table S1. Primer sequences for real-time PCR**

| Target          | Primer sequences (5' to 3')          |
|-----------------|--------------------------------------|
| NES forward     | CTG CTA CCC TTG AGA CAC CTG          |
| NES reverse     | GGG CTC TGA TCT CTG CAT CTA C        |
| NEUROD forward  | GTC TCC TTC GTT CAG ACG CT           |
| NEUROD reverse  | AAA GTC CGA GGA TTG AGT TGC          |
| TUBB3 forward   | GCG AGA TGT ACG AAG ACG AC           |
| TUBB3 reverse   | TTT AGA CAC TGC TGG CTT CG           |
| NEGR1 forward   | CAG ACT CAA CAT ACA CCC AGA AC       |
| NEGR1 reverse   | AAA CAA GTA AGA GTG ACG TTG GT       |
| RUNX2 forward   | CTA CCA CCC CGC TGT CTT C            |
| RUNX2 reverse   | CAG AGG TGG CAG TGT CAT CA           |
| COL1A1 forward  | ATG TTC AGC TTT GTG GAC CTC          |
| COL1 A1 reverse | CTG TAC GCA GGT GAT TGG TG           |
| GAPDH forward   | GGA AGG TGA AGG TCG GAG TCA          |
| GAPDH reverse   | GTC ATT GAT GGC AAC AAT ATC CAC<br>T |

## References

1. S. Y. Kim and E. G. Yang, *Nanotechnology*, 2013, **24**, 455704.
